# Supplementary material for: An effective strategy for improving charge separation efficiency and photocatalytic degradation performance using a facilely synthesized oxidative TiO2 catalyst
Source: Royal Society of Chemistry journal article supplement (doi:10.1039/d2dt00488g), 2022-01-01
Supplement: d2dt00488g1.pdf [file d2dt00488g1.pdf]

**An effective strategy for improving charge separation efficiency and photocatalytic degradation performance by facilely synthesized oxidative TiO<sub>2</sub> catalyst**

Yongqi Qin <sup>\*a,b,‡</sup>, Liqiang Deng <sup>a,b,‡</sup>, Shaodong Wei <sup>a,b</sup>, Hui Bai <sup>d</sup>, Wenqiang Gao <sup>a,b,c</sup>,  
Weizhou Jiao <sup>\*c</sup>, Tanlai Yu <sup>\*a,b</sup>

<sup>a</sup> Lvliang Key Laboratory of Comprehensive Utilization of Organic Waste Resources, Department of Chemistry and Chemical Engineering, Lvliang University, Lvliang 033001, Shanxi, China

<sup>b</sup> Lvliang Key Laboratory of Optical and Electronic Materials and Devices, Lvliang University, Lvliang 033001, Shanxi, China

<sup>c</sup> Shanxi Province Key Laboratory of Hige-Oriented Chemical Engineering, North University of China, Taiyuan 030051, Shanxi, China

<sup>d</sup> Key Laboratory of Coal Science and Technology of Ministry of Education and Shanxi Province, Taiyuan University of Technology, Taiyuan 030024, Shanxi, China

\* Corresponding authors: Yongqi Qin, E-mail: qinyq2003@163.com; Weizhou Jiao, E-mail: jwz0306@126.com; Tanlai Yu: E-mail: yutanlai1212@126.com/  
tlyu@llu.edu.cn.

## Materials

Anatase titanium dioxide ( $\geq 99\%$ ) was purchased from Shandong Pingju Biological Technology Co. LTD. Potassium permanganate ( $\text{KMnO}_4$ ) was obtained from Taihua Chemical and Agrochemical Factory. Benzoquinone and methyl orange were purchased from Tianjin Guangfu Technology Development Co. LTD. Tert-butanol, 5,5-dimethyl-1-pyrrolidine-N-oxide (DMPO), sodium oxalate, and hydrochloric acid were purchased from Aberdeen Technology Co. LTD.

**Table S1** Kinetics study results of Methyl Orange (MO) degradation by oxidative  $\text{TiO}_2$  samples.

| Photocatalysts                  | Light source | Reaction temperature | $\text{KMnO}_4$ adding | Pseudo-first order kinetic model equation: $\ln(A_0/A_t) = kt$ |         |
|---------------------------------|--------------|----------------------|------------------------|----------------------------------------------------------------|---------|
|                                 |              |                      |                        | k ( $\text{min}^{-1}$ )                                        | $R^2$   |
| Oxidative $\text{TiO}_2$<br>(a) | Xe lamp      | 80°C                 | 0.5% wt                | 0.0120                                                         | 0.99731 |
| Oxidative $\text{TiO}_2$<br>(b) | Xe lamp      | 80°C                 | 1.0% wt                | 0.00912                                                        | 0.99841 |
| Oxidative $\text{TiO}_2$<br>(c) | Xe lamp      | 80°C                 | 2.0% wt                | 0.01274                                                        | 0.99839 |
| Oxidative $\text{TiO}_2$<br>(d) | Xe lamp      | 80°C                 | 2.5% wt                | 0.01222                                                        | 0.99866 |
| Oxidative $\text{TiO}_2$<br>(e) | Xe lamp      | 80°C                 | 3.0% wt                | 0.01114                                                        | 0.9984  |
| Oxidative $\text{TiO}_2$<br>(f) | Xe lamp      | 80°C                 | 3.5% wt                | 0.01352                                                        | 0.99327 |
| Oxidative $\text{TiO}_2$<br>(g) | Xe lamp      | 80°C                 | 4.0% wt                | 0.01566                                                        | 0.99829 |
| Oxidative $\text{TiO}_2$<br>(h) | Xe lamp      | 25°C                 | 4.0% wt                | 0.01431                                                        | 0.99697 |
| Oxidative $\text{TiO}_2$<br>(i) | Xe lamp      | 150°C                | 4.0% wt                | 0.01321                                                        | 0.99468 |
| Oxidative $\text{TiO}_2$<br>(j) | Xe lamp      | 200°C                | 4.0% wt                | 0.00967                                                        | 0.98811 |

<sup>a</sup> where  $A_0$  is the initial absorbance of MO solution;  $A_t$  is the absorbance of MO solution after time (t) of degradation; Parameters were fixed at:  $A_0 = 1.084$ , pH = 6.0 and  $[\text{catalyst}]_0 = 0.2\text{g/L}$ .

**Table S2** Structural Parameters of oxidative TiO<sub>2</sub> and pristine TiO<sub>2</sub>.

| Sample                     | Crystallite Size D<br>(nm) | dislocation density<br>( $\delta$ ) (line/m <sup>2</sup> ) ( $\times 10^{16}$ ) | microstrain ( $\epsilon$ )<br>( $\times 10^{-2}$ ) |
|----------------------------|----------------------------|---------------------------------------------------------------------------------|----------------------------------------------------|
| Pristine TiO <sub>2</sub>  | 5.40                       | 3.42                                                                            | 6.38                                               |
| Oxidative TiO <sub>2</sub> | 5.67                       | 3.12                                                                            | 6.04                                               |

<sup>a</sup> Scherrer Formular: where  $D = (0.89 \times \lambda) / (\beta \times \text{Cos}\theta)$  where,  $\lambda = 1.5406$  nm.

<sup>b</sup> Williamson and Smallman equation:  $\delta = \frac{n}{D^2}$ .

<sup>c</sup>  $\epsilon = \frac{\beta \cos\theta}{4}$ .

**Table S3** Interplanar spacing of oxidative TiO<sub>2</sub> and pristine TiO<sub>2</sub>.

| (hkl)planes | Pristine TiO <sub>2</sub> |                 | Oxidative TiO <sub>2</sub> |                 |
|-------------|---------------------------|-----------------|----------------------------|-----------------|
|             | Peak position             | Interplanar     | Peak position              | Interplanar     |
|             | ( $2\theta$ )             | Spacing (d) / Å | ( $2\theta$ )              | Spacing (d) / Å |
| 101         | 25.40                     | 3.5033          | 25.32                      | 3.5140          |
| 103         | 37.08                     | 2.4226          | 36.99                      | 2.4280          |
| 004         | 37.84                     | 2.3757          | 37.83                      | 2.3762          |
| 112         | 38.56                     | 2.3331          | 38.45                      | 2.3392          |
| 200         | 48.16                     | 1.8879          | 48.08                      | 1.8908          |
| 105         | 53.99                     | 1.6971          | 53.94                      | 1.6985          |
| 211         | 55.20                     | 1.6627          | 55.11                      | 1.6651          |
| 116         | 68.84                     | 1.3627          | 68.83                      | 1.3630          |
| 220         | 70.34                     | 1.3373          | 70.36                      | 1.3369          |
| 215         | 75.10                     | 1.2639          | 75.12                      | 1.2639          |
| 301         | 76.07                     | 1.2502          | 76.11                      | 1.2497          |

<sup>a</sup> Bragg's equation was used to estimate the interplanar distances (d).  $n\lambda = 2d\sin\theta$ .

**Table S4** Lattice parameters and cell volume of oxidative TiO<sub>2</sub> and pristine TiO<sub>2</sub>.

| sample                     | a (Å)  | c (Å)  | Volume (Å <sup>3</sup> ) |
|----------------------------|--------|--------|--------------------------|
| Oxidative TiO <sub>2</sub> | 3.7815 | 9.5121 | 136.02                   |
| Pristine TiO <sub>2</sub>  | 3.7759 | 9.3906 | 133.89                   |

<sup>a</sup> Where  $\frac{1}{d^2} = \frac{h^2+k^2}{a^2} + \frac{l^2}{c^2}$  (Tetragonal phase).

<sup>b</sup>  $V = a^2c$ .

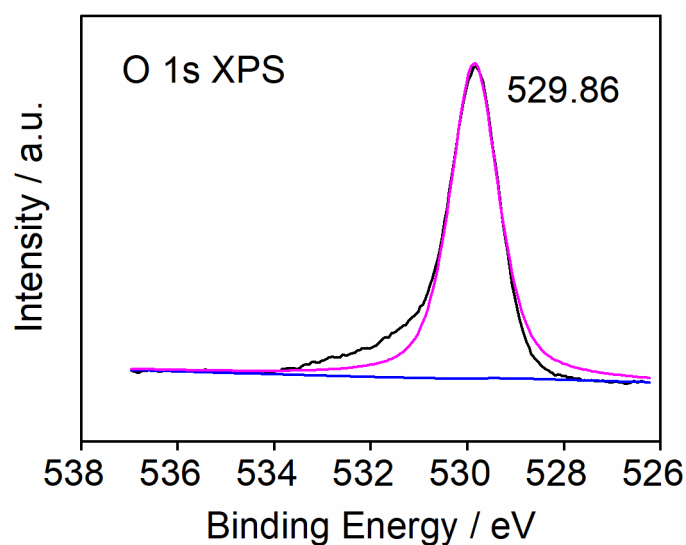

**Fig. S1** High-resolution XPS spectra of O 1s for oxidative TiO<sub>2</sub> synthesized at 200°C.

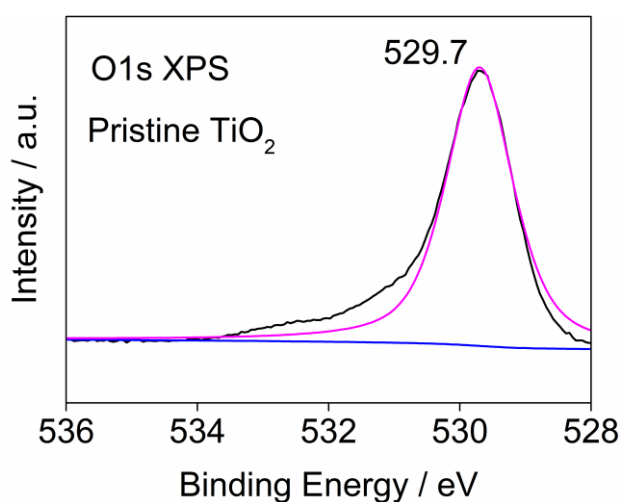

**Fig. S2** High-resolution XPS spectra of O 1s for pristine TiO<sub>2</sub>.

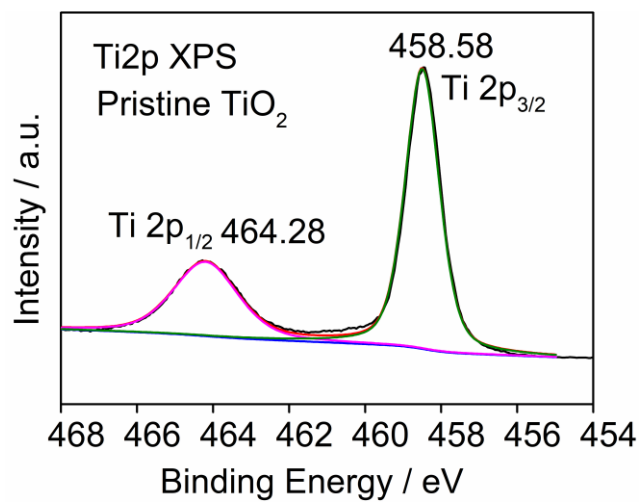

Fig. S3 High-resolution XPS spectra of Ti 2p for pristine TiO<sub>2</sub>.

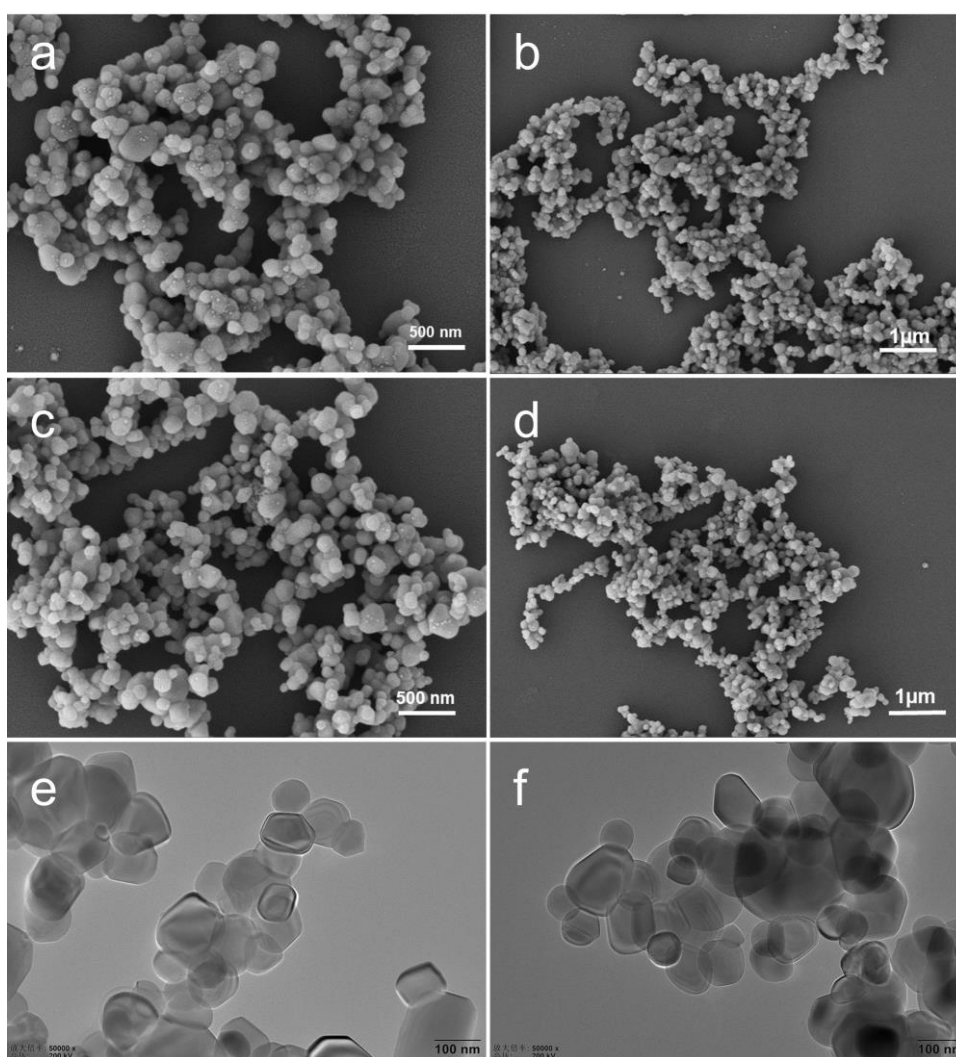

Fig. S4 SEM images of oxidative TiO<sub>2</sub> (a, b) and pristine TiO<sub>2</sub> (c,d). TEM images of oxidative TiO<sub>2</sub> (e) and pristine TiO<sub>2</sub> (f).

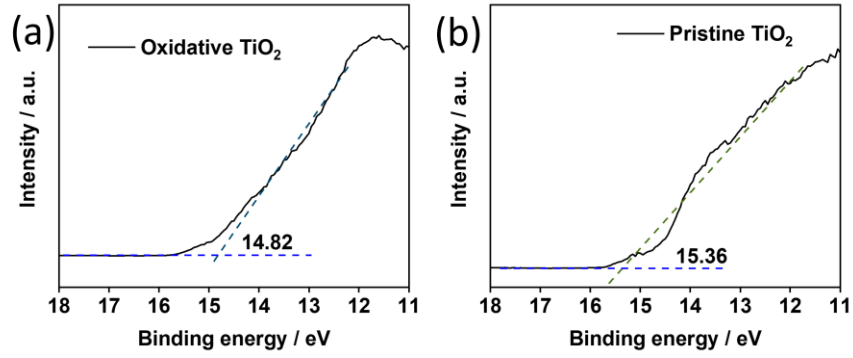

Fig. S5 UPS spectra of oxidative TiO<sub>2</sub> (a) and pristine TiO<sub>2</sub> (b).

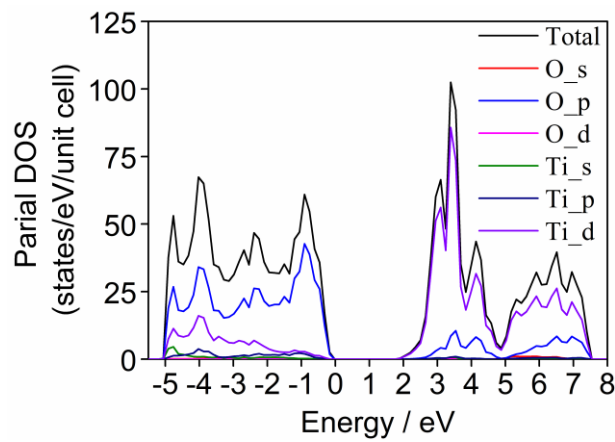

Fig. S6 Calculated DOS of pristine TiO<sub>2</sub>.

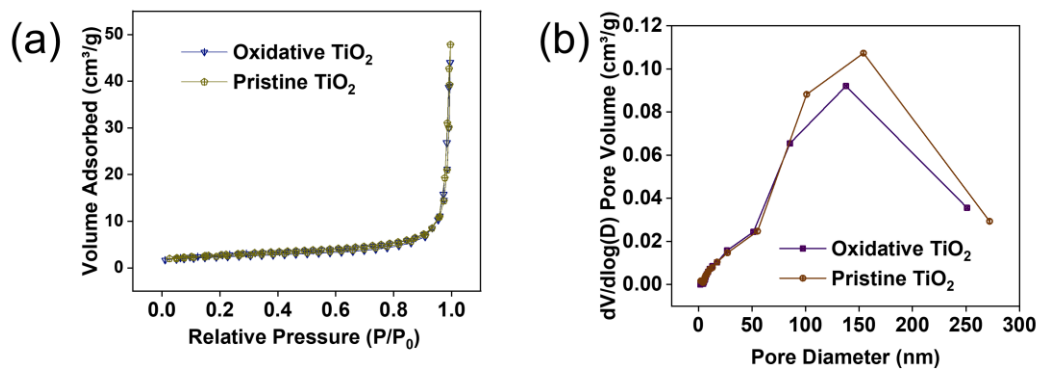

Fig. S7 N<sub>2</sub> adsorption-desorption isotherms(a) and BJH pore size distribution curves (b).

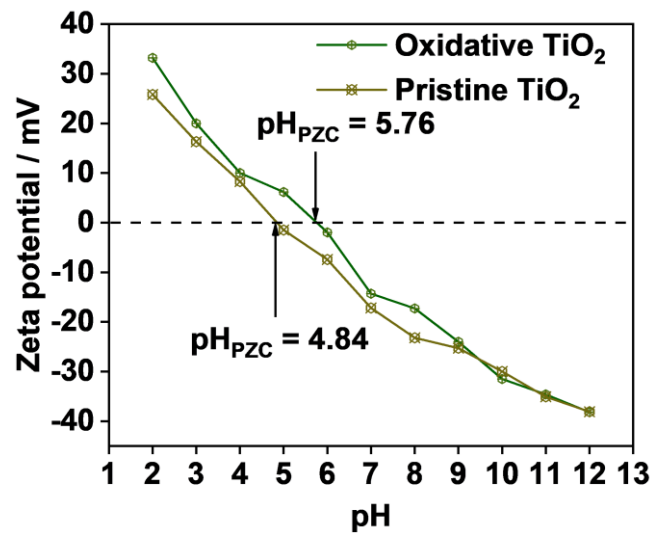

Fig. S8 Zeta potential of oxidative TiO<sub>2</sub> and pristine TiO<sub>2</sub>.

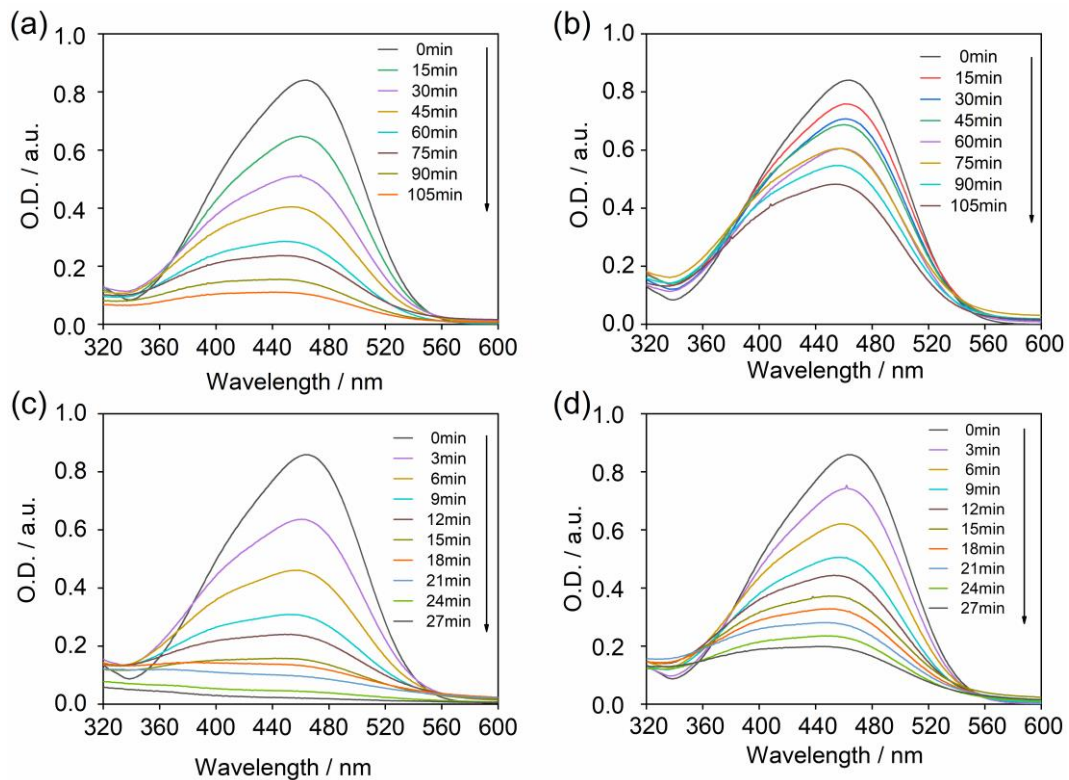

Fig. S9 UV-vis spectra of MO solution at different time under simulated sunlight irradiation using (a) oxidative TiO<sub>2</sub> and (b) pristine TiO<sub>2</sub>. UV-vis spectra of MO solution at different time under UV light using (c) oxidative TiO<sub>2</sub> and (d) pristine TiO<sub>2</sub>.

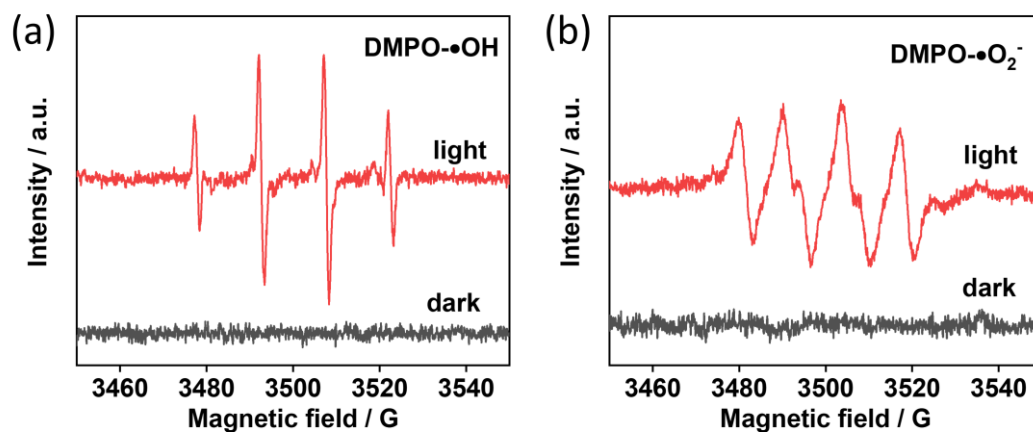

**Fig. S10** ESR spectra of pristine TiO<sub>2</sub> under Xe lamp irradiation and in the dark: (a) DMPO-•OH and (b) DMPO-•O<sub>2</sub><sup>-</sup>.
